# Supplementary material
Source: PubMed Central journal article supplement (PMC3545291)
Supplement: emboj2012313s2.pdf [file emboj2012313s2.pdf]

Fig.1B

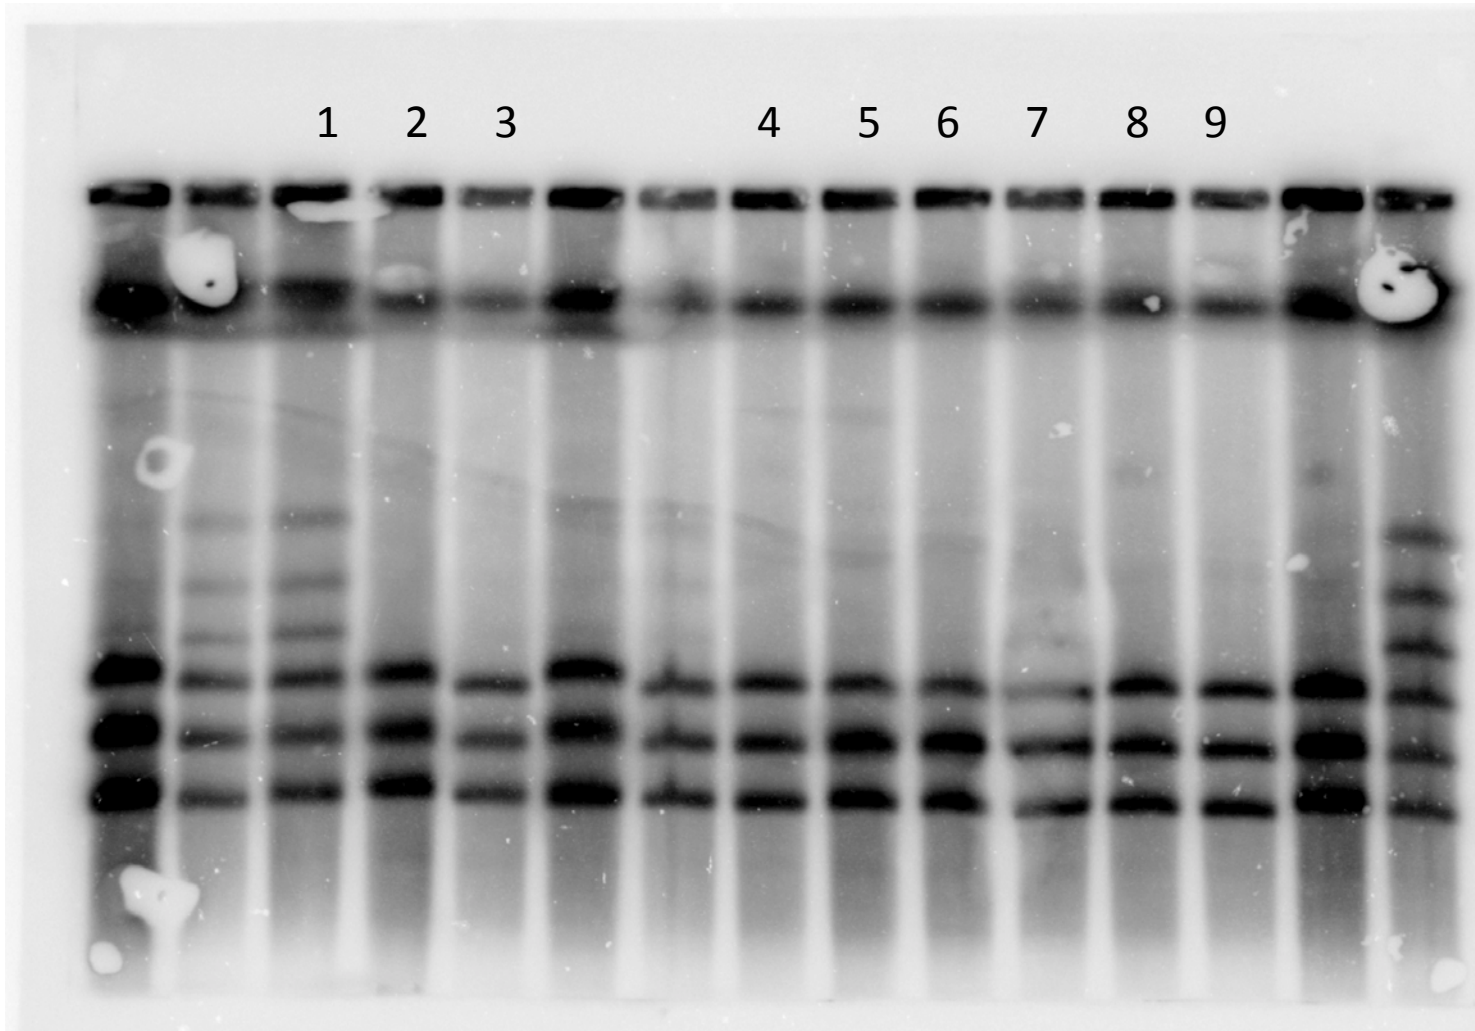

1- *taz1Δ* G1, 2- *rad32Δtaz1Δ* S/G2, 3- *rad32Δtaz1Δ* G1, 4- *rad50Δtaz1Δ* S/G2,  
5- *rad50Δtaz1Δ* G1, 6- *nbs1Δtaz1Δ* S/G2, 7- *nbs1Δtaz1Δ* G1, 8- *nbs1Δlig4Δtaz1Δ* S/G2,  
9- *nbs1Δlig4Δtaz1Δ* G1
