# Supplementary material
Source: PubMed Central journal article supplement (PMC3545291)
Supplement: emboj2012313s3.pdf [file emboj2012313s3.pdf]

Fig.2A

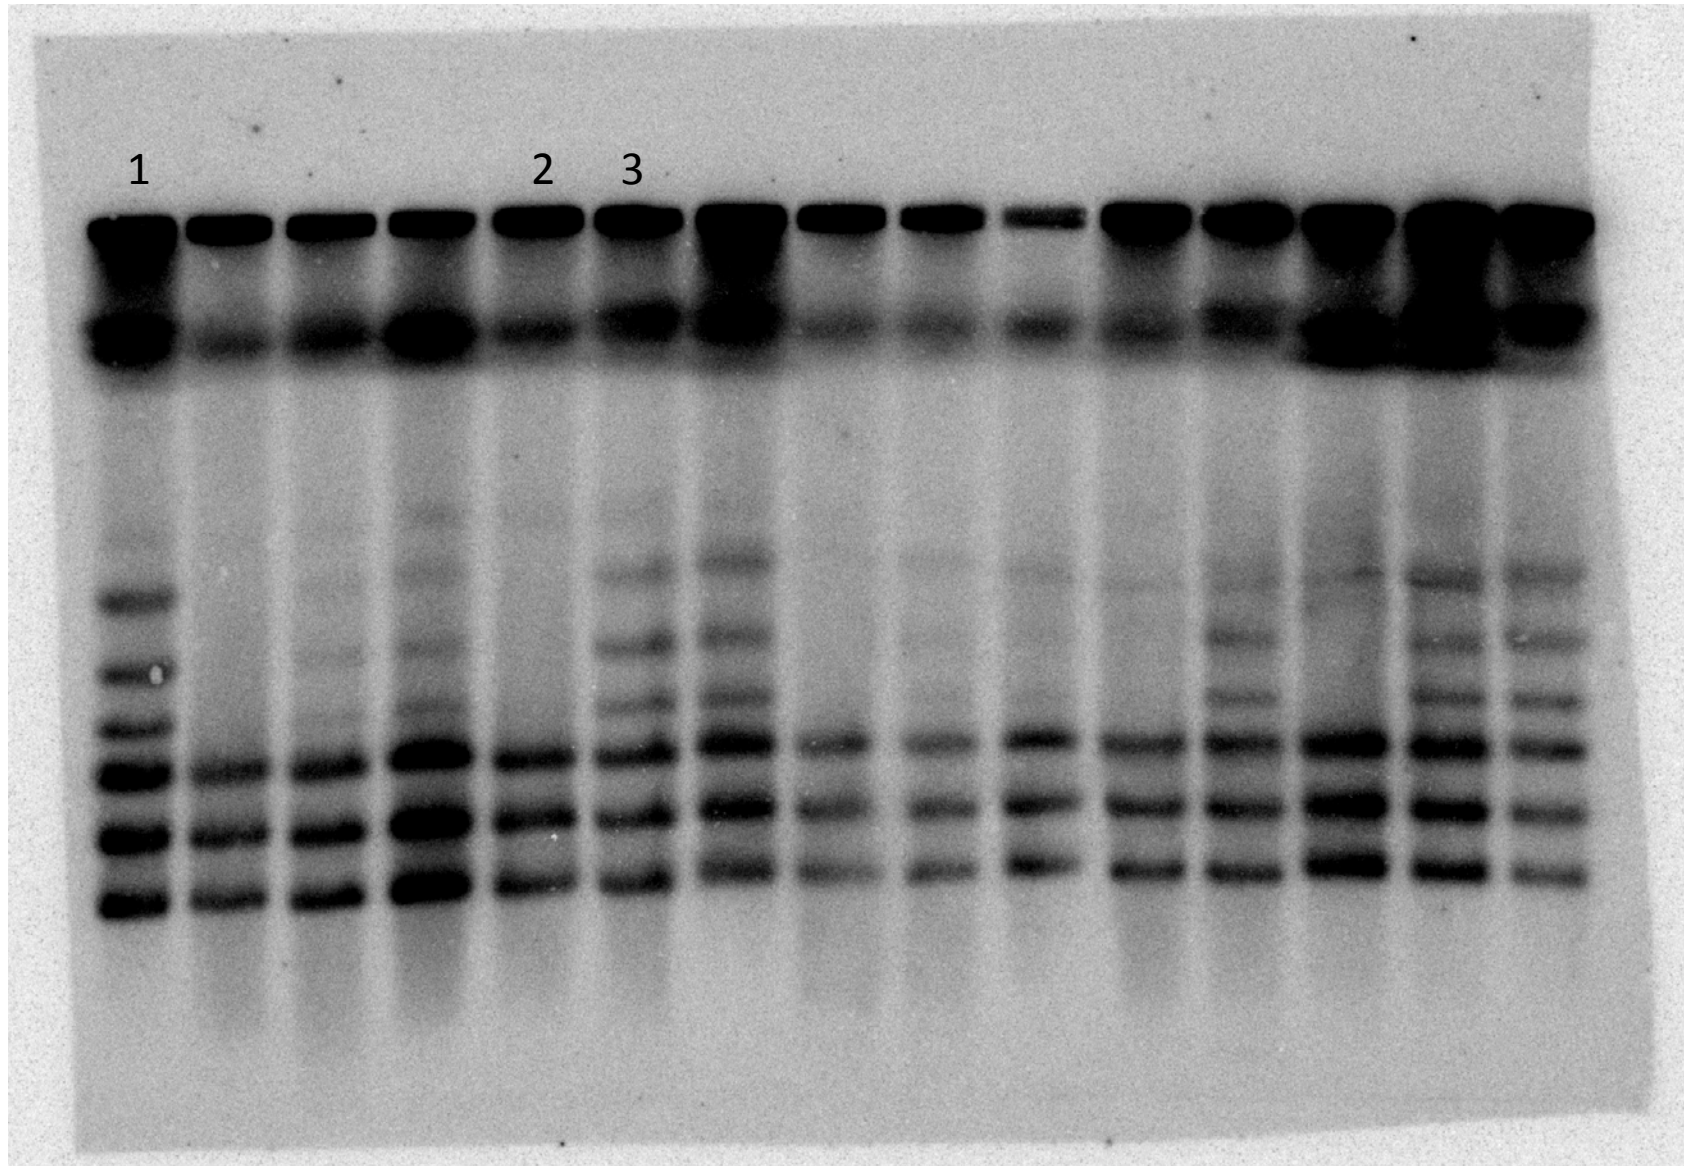

1- *taz1* $\Delta$  G1, 2- *ctp1* $\Delta$ *taz1* $\Delta$  S/G2, 3-*ctp1* $\Delta$ *taz1* $\Delta$  G1

Fig.2B

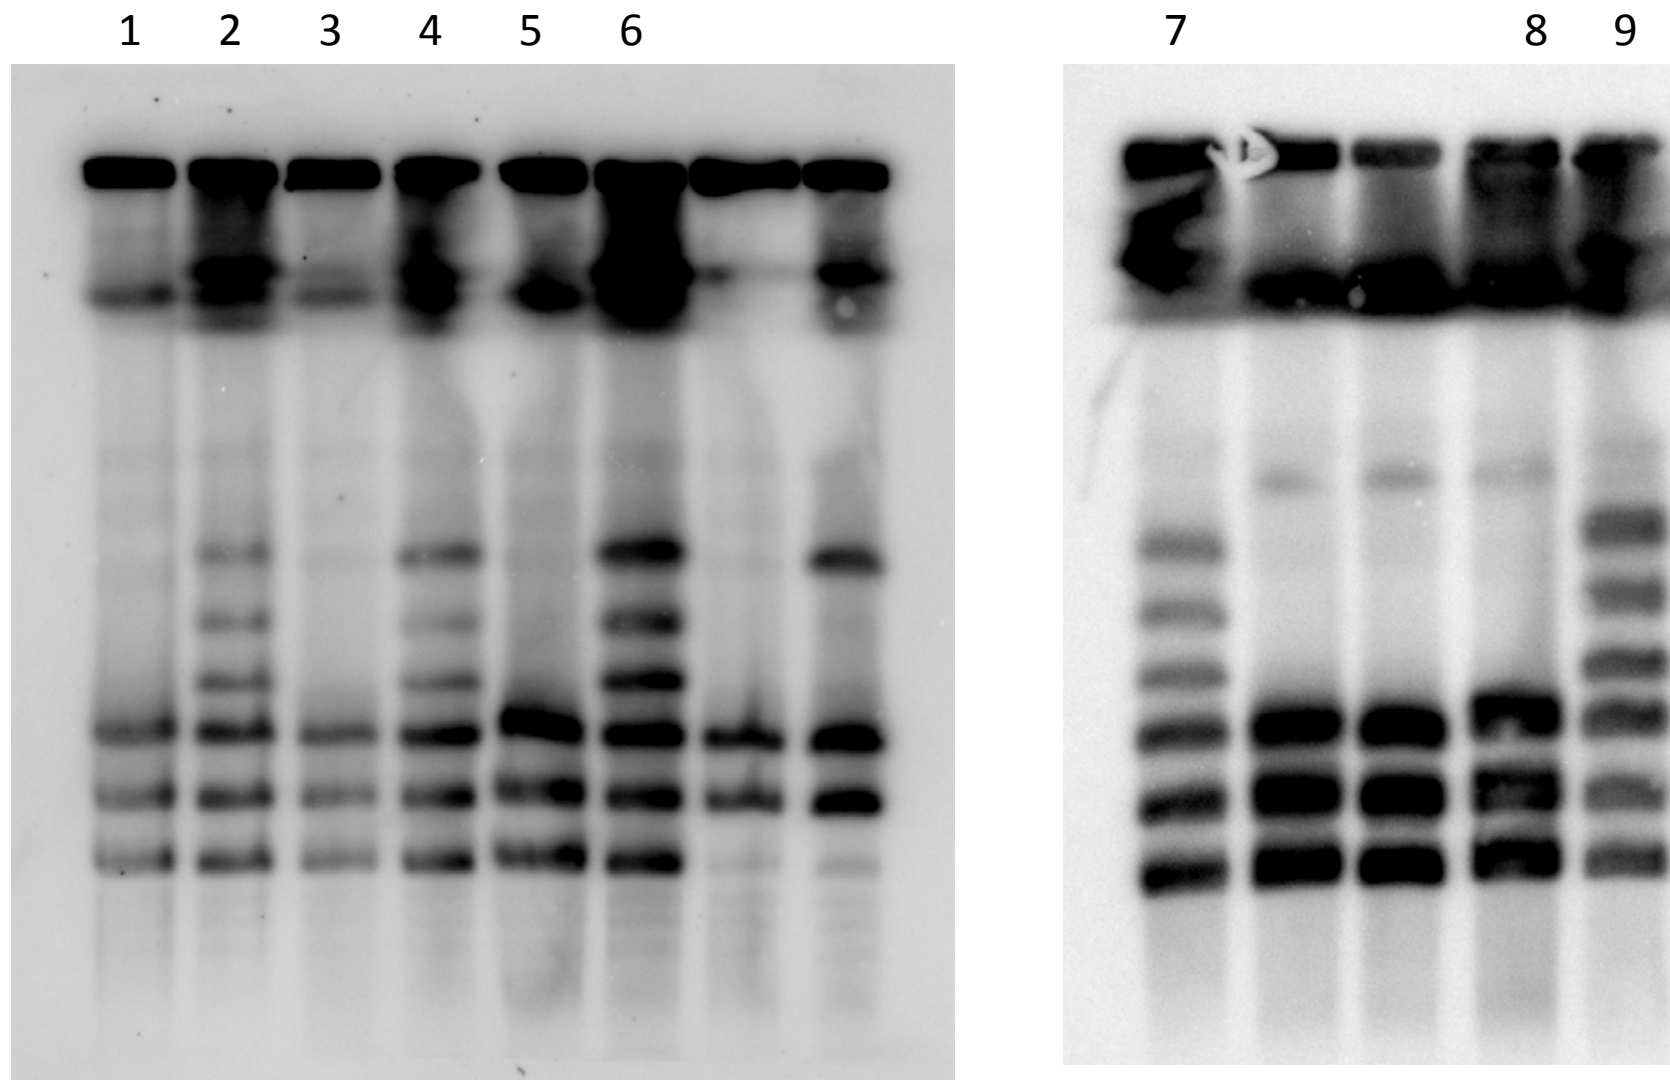

1- *taz1* $\Delta$  S/G2, 2- *taz1* $\Delta$  G1, 3- *dna2-c2 taz1* $\Delta$  S/G2 25°C , 4 -*dna2-c2 taz1* $\Delta$  G1 25°C,  
5- *dna2-c2 taz1* $\Delta$  S/G2 30°C , 6 -*dna2-c2 taz1* $\Delta$  G1 30°C  
7- *taz1* $\Delta$  G1, 8- *exo1* $\Delta$ *taz1* $\Delta$  S/G2 , 9- *exo1* $\Delta$ *taz1* $\Delta$  G1

Fig.2C

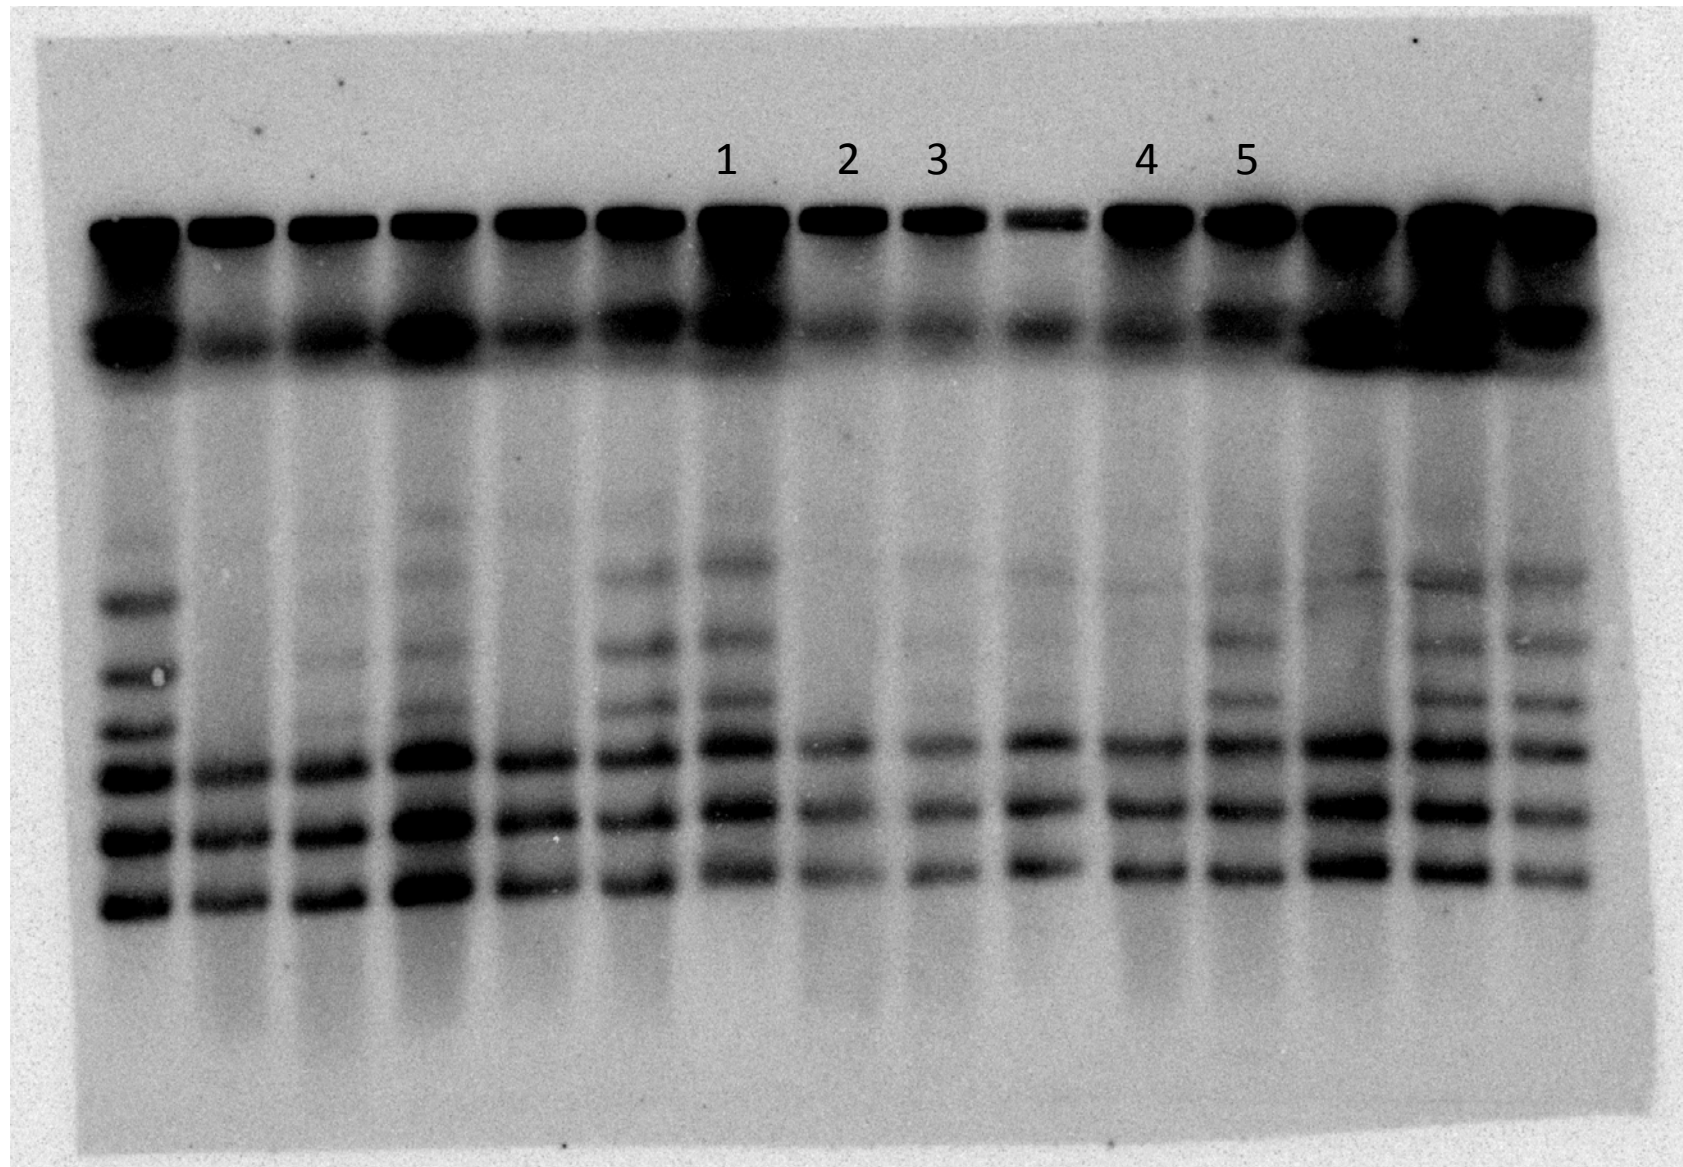

1- *rap1* $\Delta$  G1, 2- *nbs1* $\Delta$ *rap1* $\Delta$  S/G2, 3- *nbs1* $\Delta$ *rap1* $\Delta$  G1,  
4- *ctp1* $\Delta$ *rap1* $\Delta$  S/G2, 5- *ctp1* $\Delta$ *rap1* $\Delta$  G1
