# Supplementary material
Source: PubMed Central journal article supplement (PMC3545291)
Supplement: emboj2012313s4.pdf [file emboj2012313s4.pdf]

Fig.3B

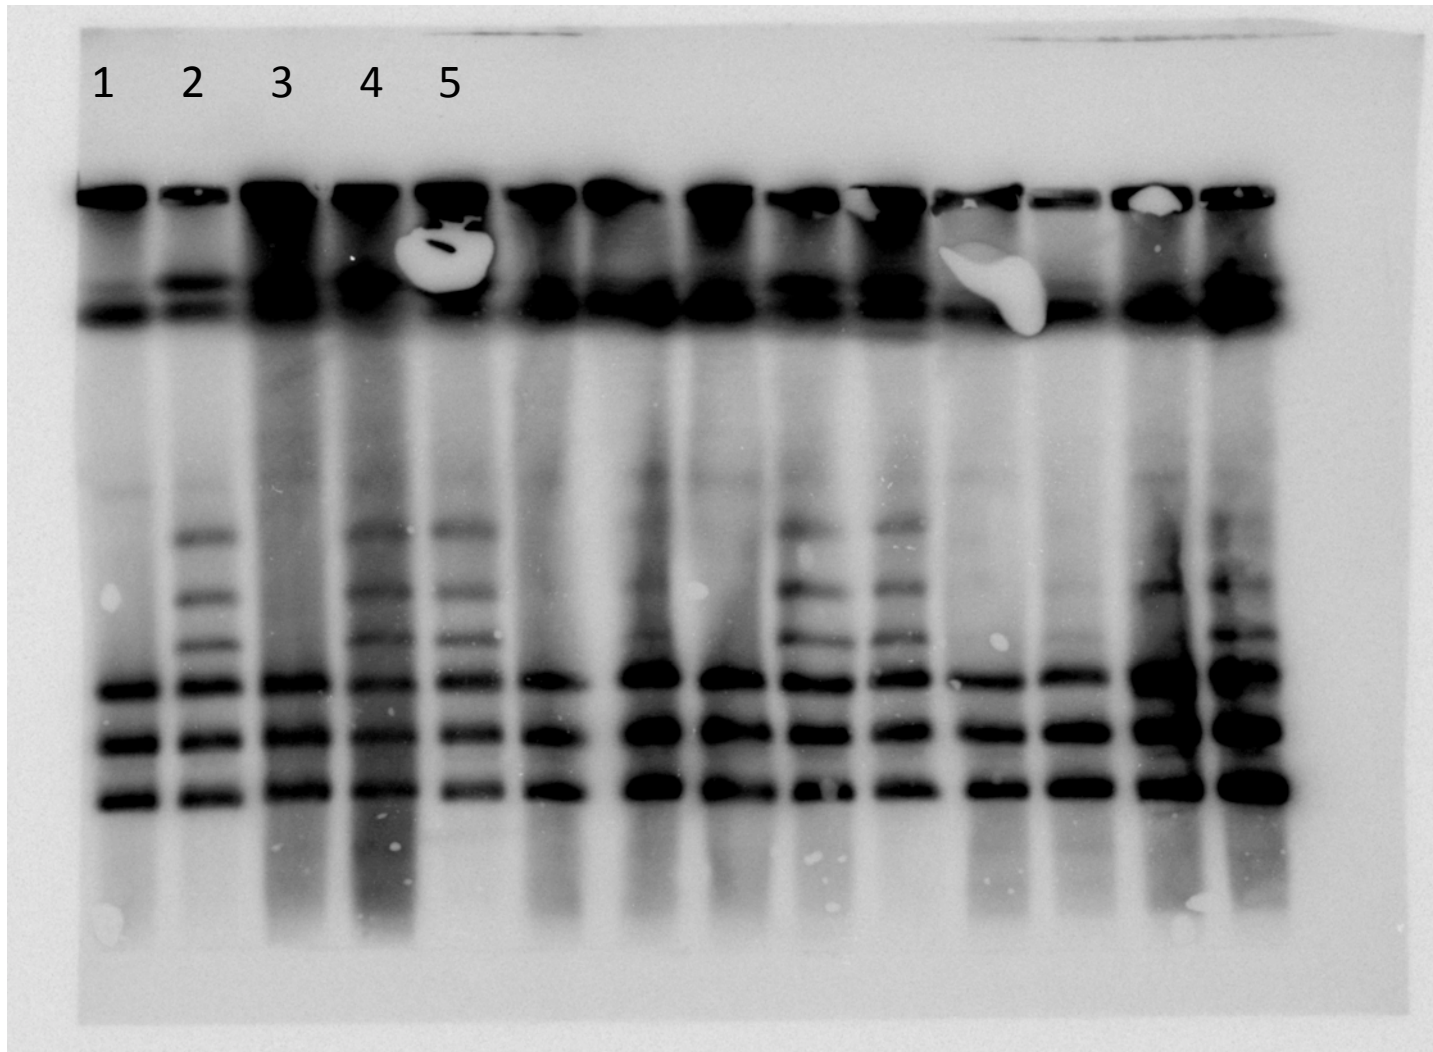

1- *rad3Δ taz1Δ* S/G2, 2- *rad3Δ taz1Δ* G1, 3- *tel1Δtaz1Δ* S/G2, 4- *tel1Δtaz1Δ* G1  
5- *taz1Δ* G1

Fig.3C

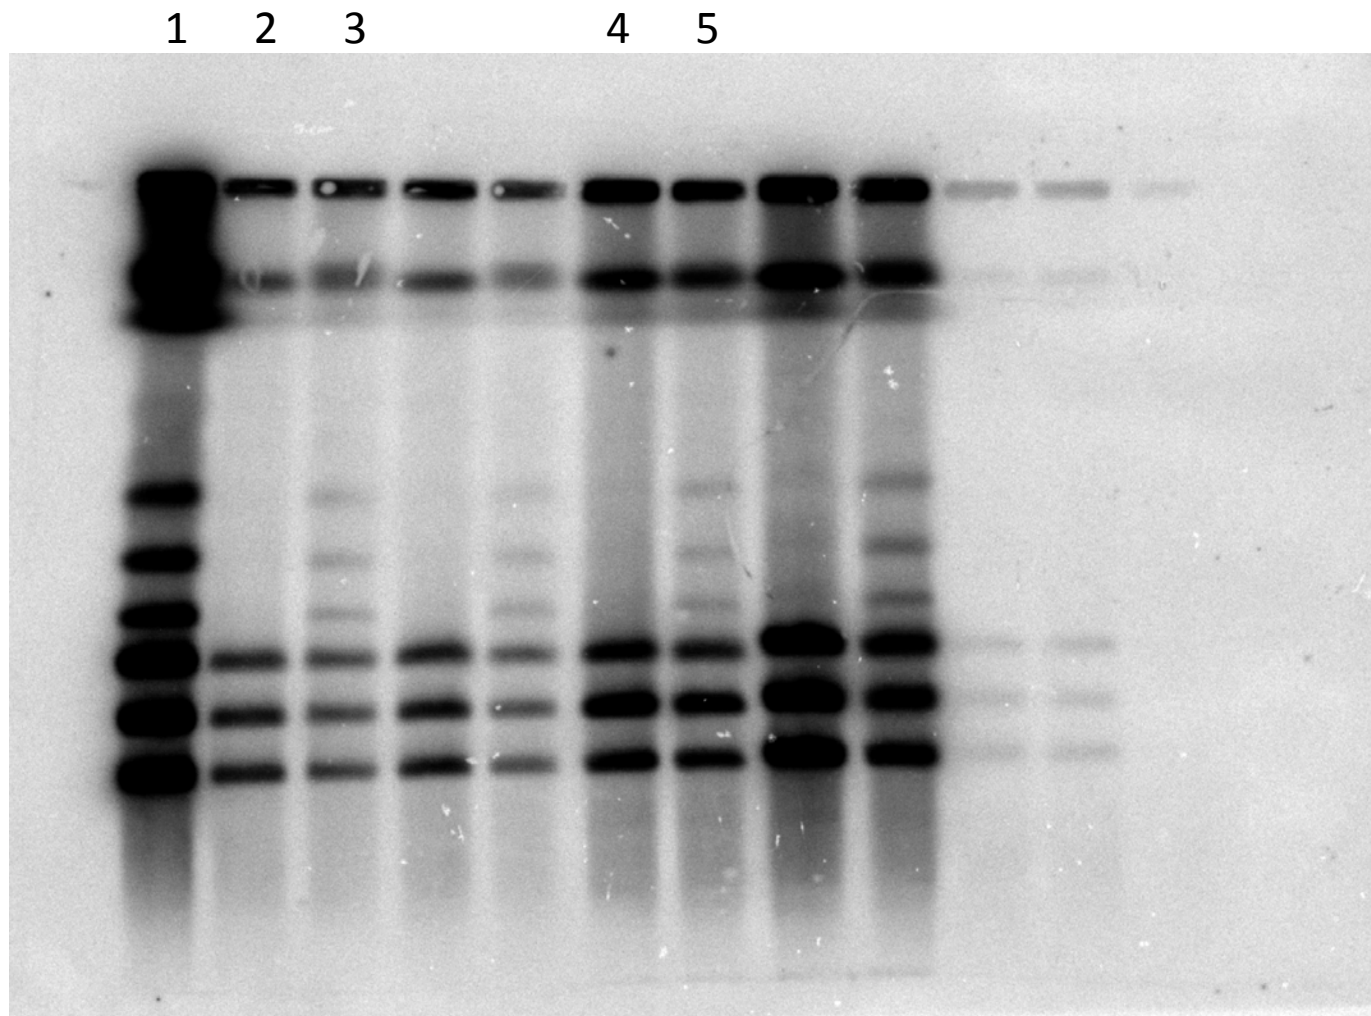

1- *taz1* $\Delta$  G1, 2- *rad3* $\Delta$ *tel1* $\Delta$ *taz1* $\Delta$  S/G2, 3- *rad3* $\Delta$ *tel1* $\Delta$ *taz1* $\Delta$  G1,  
4- *rad3* $\Delta$ *tel1* $\Delta$ *rap1* $\Delta$  S/G2, 5- *rad3* $\Delta$ *tel1* $\Delta$ *rap1* $\Delta$  G1
