# Supplementary material
Source: PubMed Central journal article supplement (PMC3545291)
Supplement: emboj2012313s7.pdf [file emboj2012313s7.pdf]

Fig.S 3A

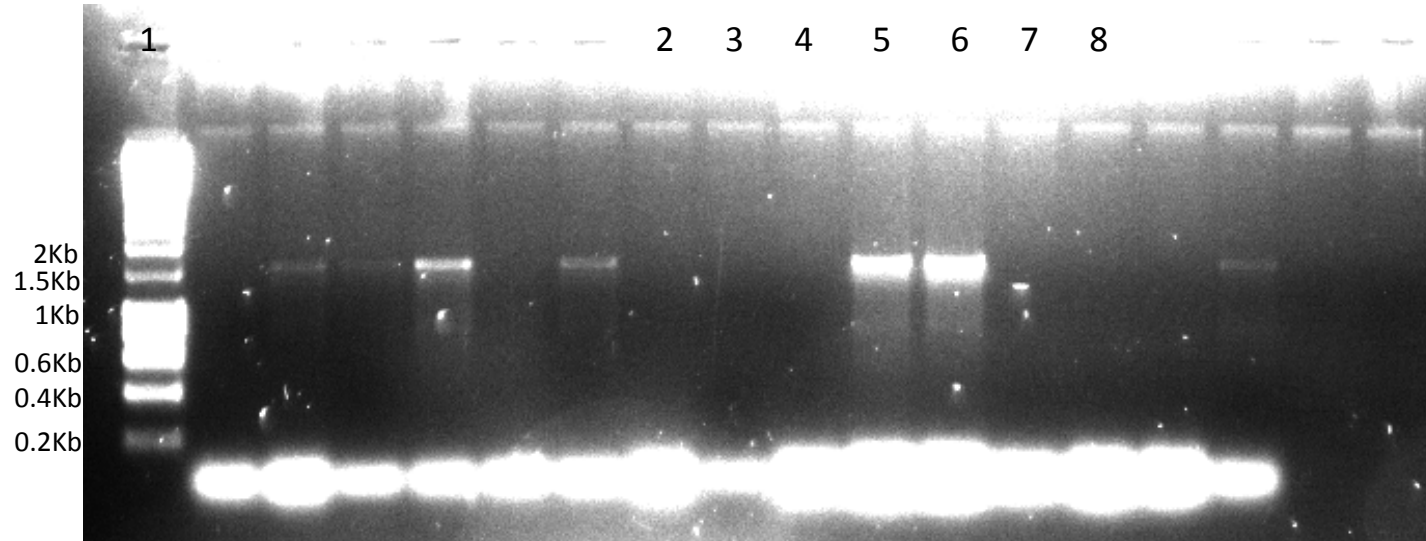

Fig.S 3B

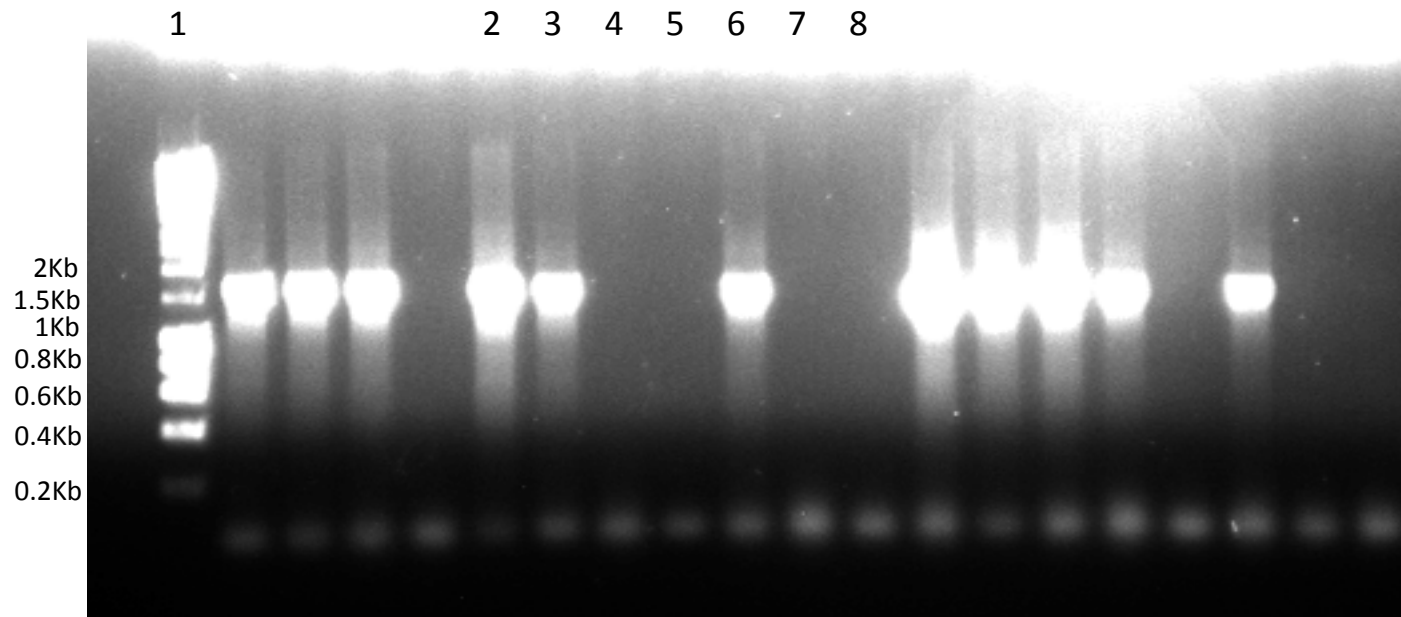

1- HyperLadder I; 2 to 6- cells resulting form co-transformation of digested pKan1 plasmid and *LEU2* fragment; 7- untransformed cells; 8- cells transformed with digested pKan1 plasmid alone.
