# Supplementary material
Source: PubMed Central journal article supplement (PMC3545291)

Fig.Supp1

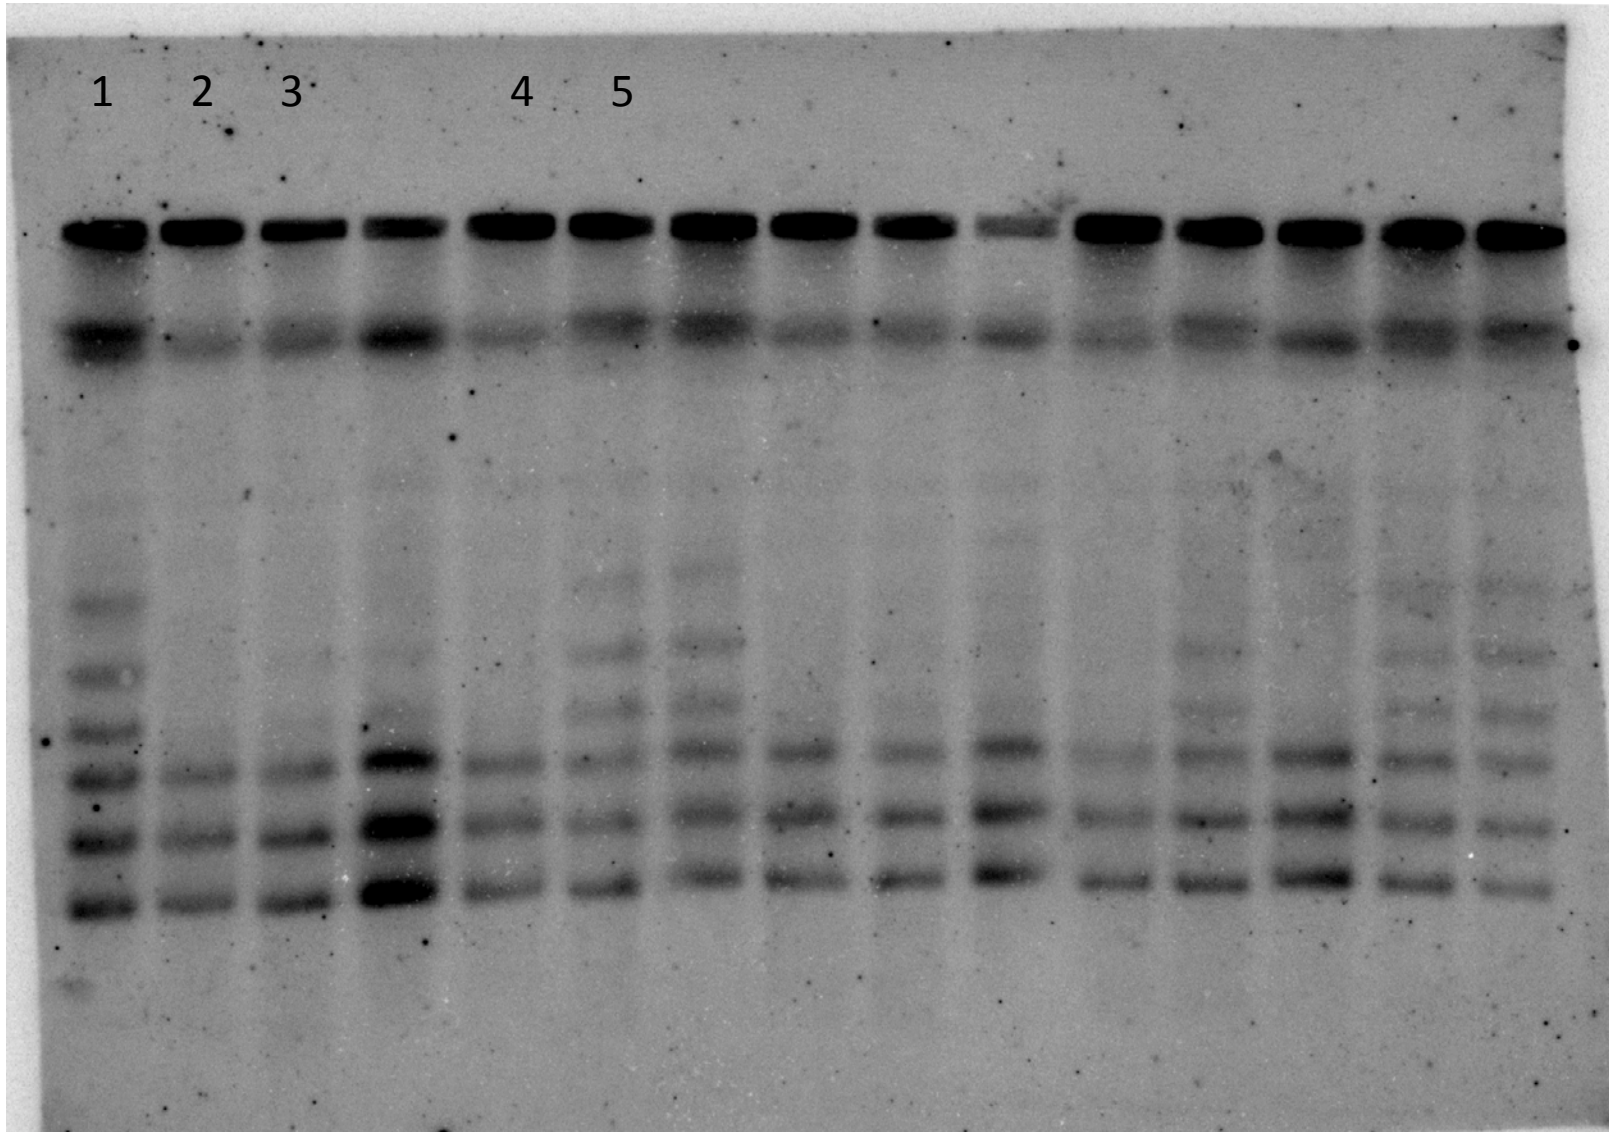

1- *taz1Δ* G1, 2- *nbs1Δrap1Δ* S/G2, 3- *nbs1Δrap1Δ* G1, 4- *ctp1Δrap1Δ* S/G2,  
5- *ctp1Δrap1Δ* G1

Supplement: emboj2012313s6.pdf [file emboj2012313s6.pdf]
